# Supplementary material for: Achiral Mannich-Base Curcumin Analogs Induce Unfolded Protein Response and Mitochondrial Membrane Depolarization in PANC-1 Cells
Source: PubMed Central journal article supplement (PMC5666787; doi:10.3390/ijms18102105), 2017-10-07
Supplement: ijms-18-02105-s001.pdf [file ijms-18-02105-s001.pdf]

# **Supplementary materials**

## **Supporting materials and methods**

### **Cell confluency screening**

A549 cells ( $6 \times 10^3$ ) were seeded into 96-well plates (Corning Life Sciences) in DMEM/F12 10 % FCS (Gibco). Cells were cultured overnight before treatment. Effects of curcumin and analogs were examined in concentrations presented in the figure after 72h incubation in 100  $\mu$ l media. We monitored the cell confluency by JuLI™ FL Live Cell Analyser V.0 (NanoEntek) according to the instructions of the manufacturer. We present the confluency determined by the JuLI™ FL Live Cell Analyser after 72h treatment. Data were analyzed by GraphPad Prism® 5.

### **Supplementary figures:**

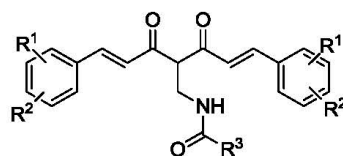

| Compound | R <sup>1</sup> | R <sup>2</sup> | R <sup>3</sup> | Molecular weight |
|----------|----------------|----------------|----------------|------------------|
| C501     | 3-OH           |                |                | 441              |
| C502     | 3-OH           |                |                | 509              |
| C503     | 3-OH           |                |                | 472              |
| C504     | 3-OH           |                |                | 459              |
| C505     | 3-OH           |                |                | 459              |
| C509     | 3-OH           |                |                | 414              |
| C510     | 3-OH           |                |                | 420              |
| C513     | 3-OH           |                |                | 534              |
| C514     | 3-OH           |                |                | 485              |
| C515     | 3-OH           |                |                | 505              |
| C516     | 3-OH           |                |                | 465              |
| C517     | 3-F            |                |                | 418              |
| C518     | 4-F            |                |                | 418              |
| C519     | 2-F            |                |                | 418              |
| C520     | 3-OMe          | 4-OH           |                | 474              |
| C521     | 3-OH           | 4-OMe          |                | 474              |

|      |        |       |                                                                                    |     |
|------|--------|-------|------------------------------------------------------------------------------------|-----|
| C524 | 3-OMe  | 4-OMe |  | 502 |
| C525 | 3-OH   | 3-OH  |  | 446 |
| C526 | 4-COOH |       |  | 470 |
| C529 | 4-COOH |       |  | 521 |
| C530 | 3-OH   | 3-OH  |  | 497 |
| C532 | 3-OH   |       |  | 418 |
| C533 | 3-OH   |       |  | 415 |

**Figure S1.** Chemical structure of curcumin analogs.

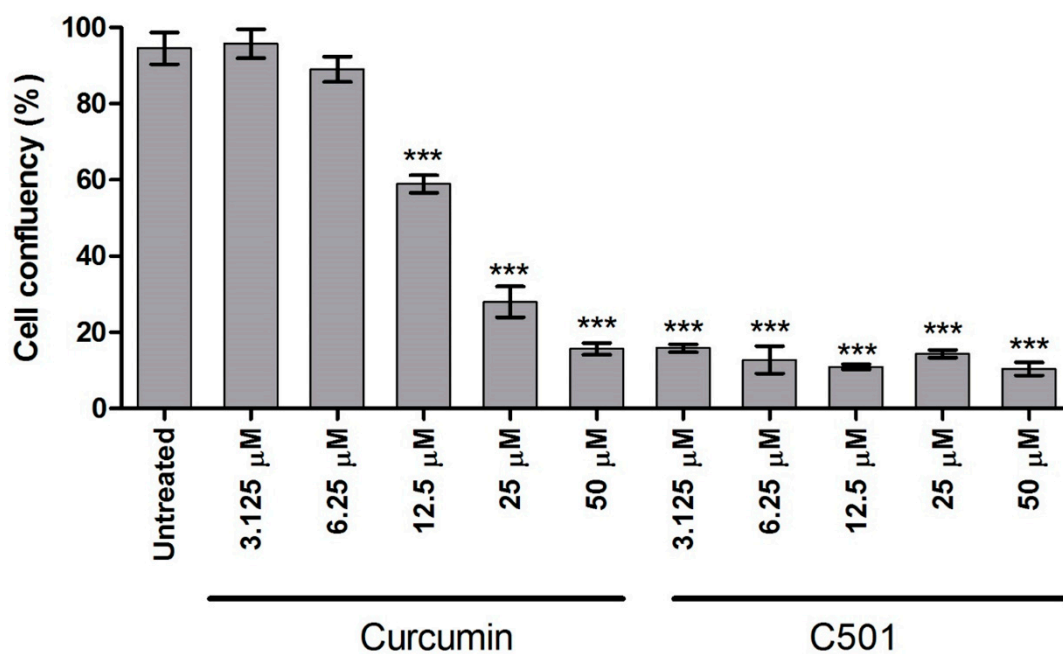

**Figure S2.** Curcumin and C501 hampered the viability of A549 cells. Cell confluency data of cells treated (from left to right: untreated, 3.125, 6.25, 12.5, 25 and 50 μM) in duplicates for 72h, recorded by Juli<sup>TM</sup>. The arithmetic mean values of two samples ± SD are presented. For experimental details see Supporting materials and methods.

### A549

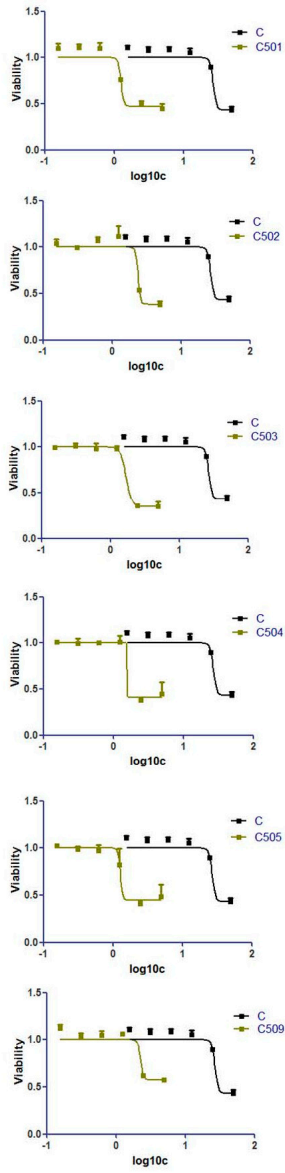

### HepG2

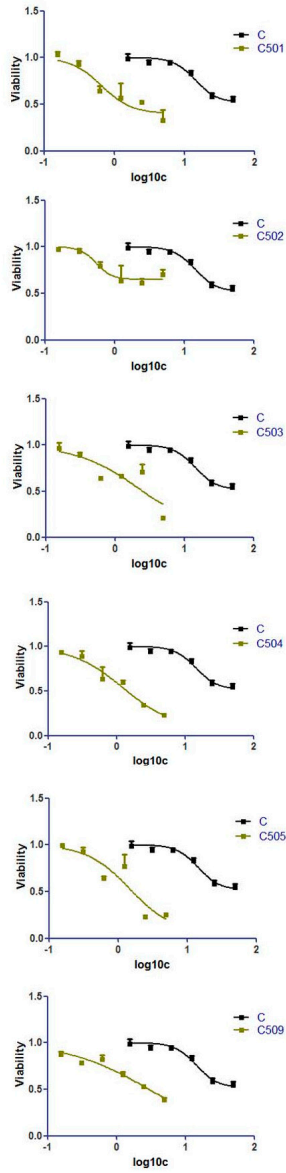

### PANC-1

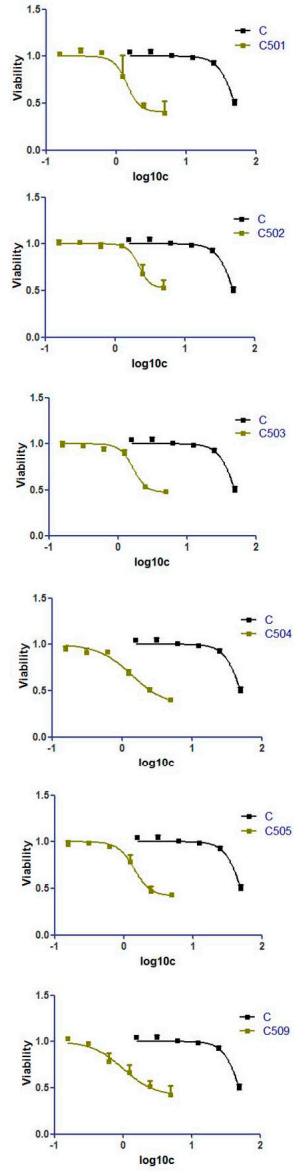

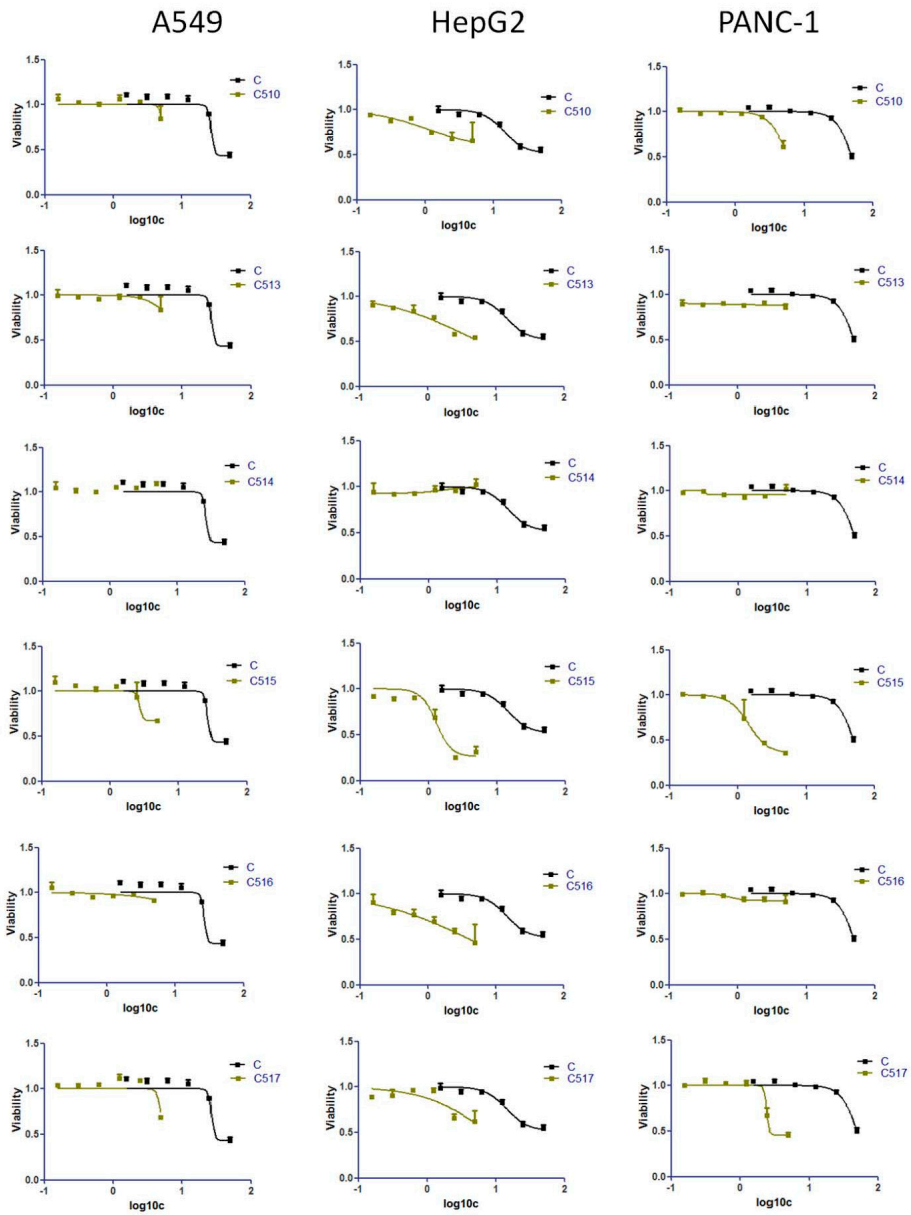

### A549

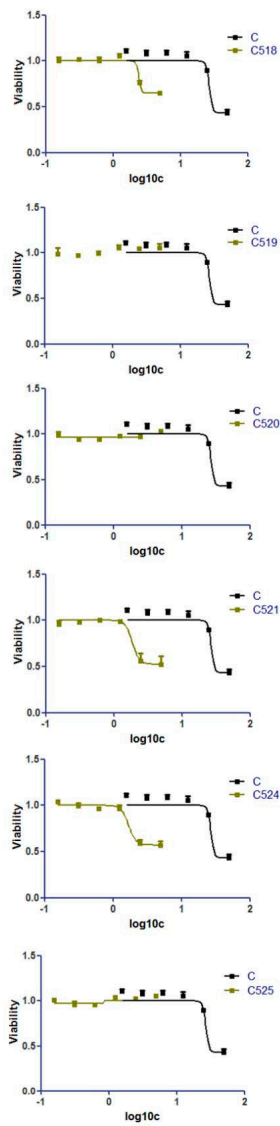

### HepG2

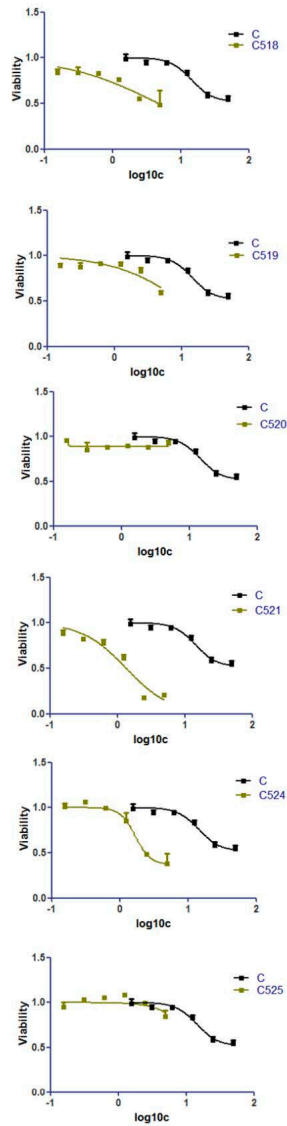

### PANC-1

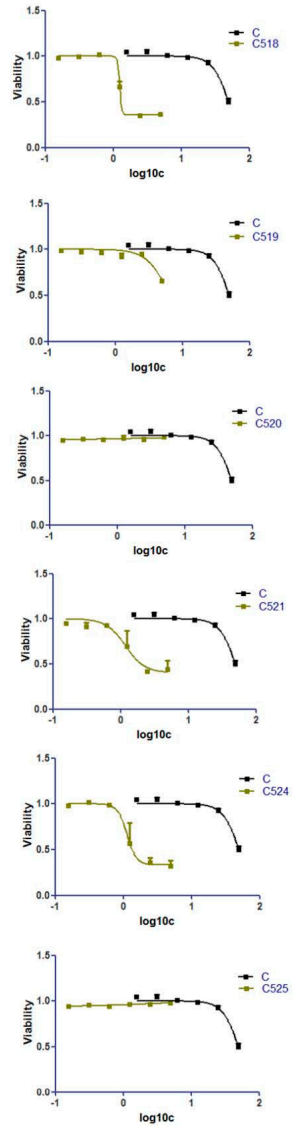

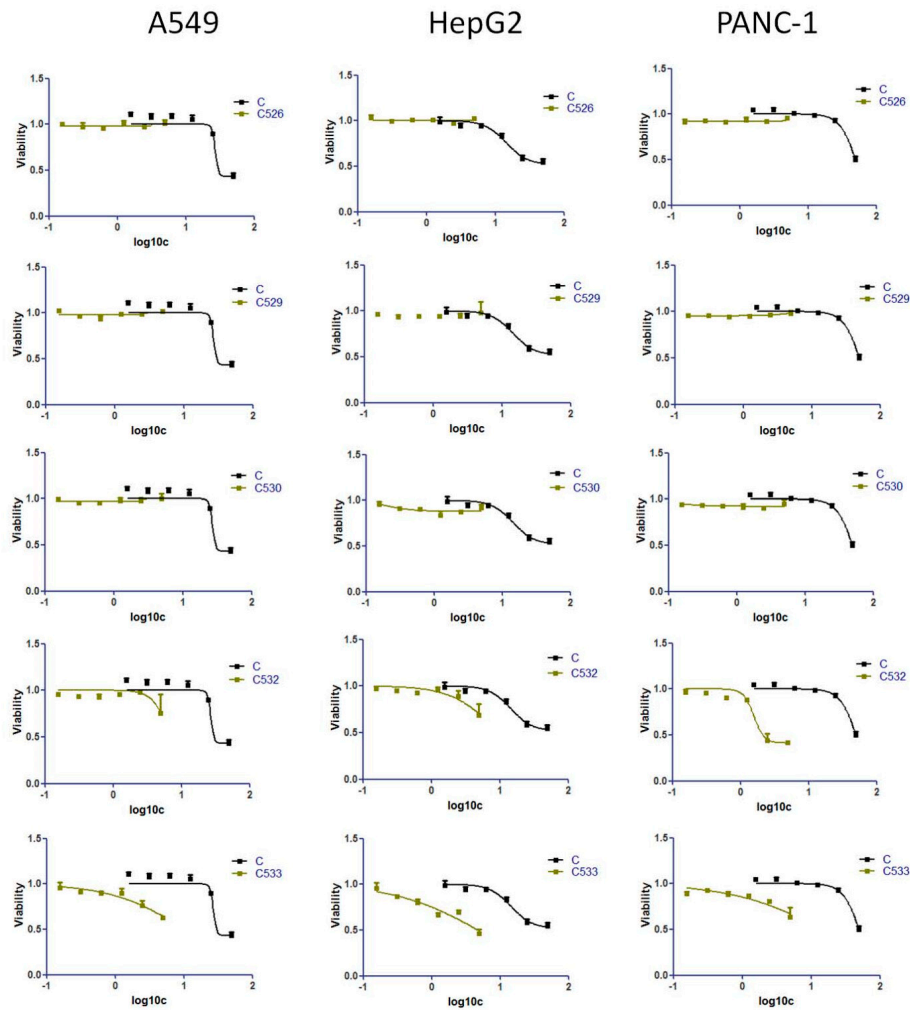

**Figure S3.** Dose-response curves of curcumin and curcumin analogs on A549, HepG2 and PANC-1 cells. Cells were treated with curcumin (C, 1.56, 3.125, 6.25, 12.5, 25 and 50  $\mu\text{M}$ ), and curcumin analogs (0.16, 0.3125, 0.625, 1.25, 2.5 and 5  $\mu\text{M}$ ) in duplicates for 72 h. Viability was examined by resazurin assay as described in the 3.2. Materials and methods. The arithmetic means of two samples  $\pm$  SD are presented.

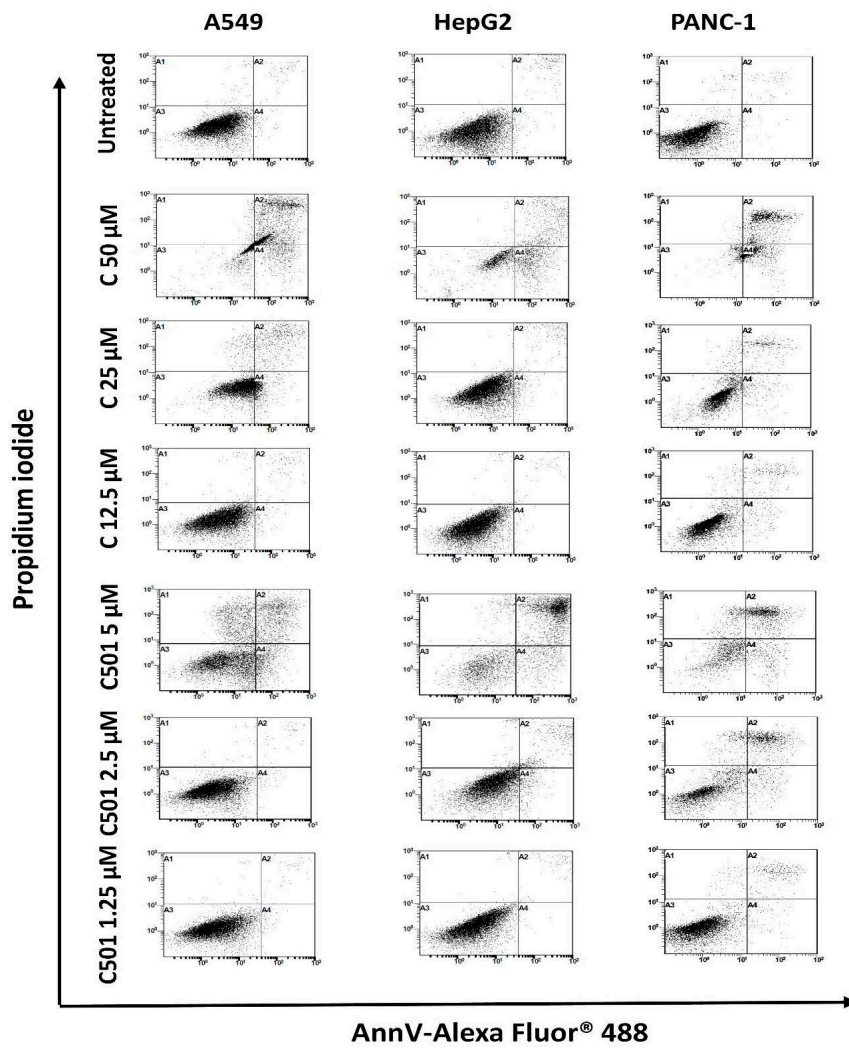



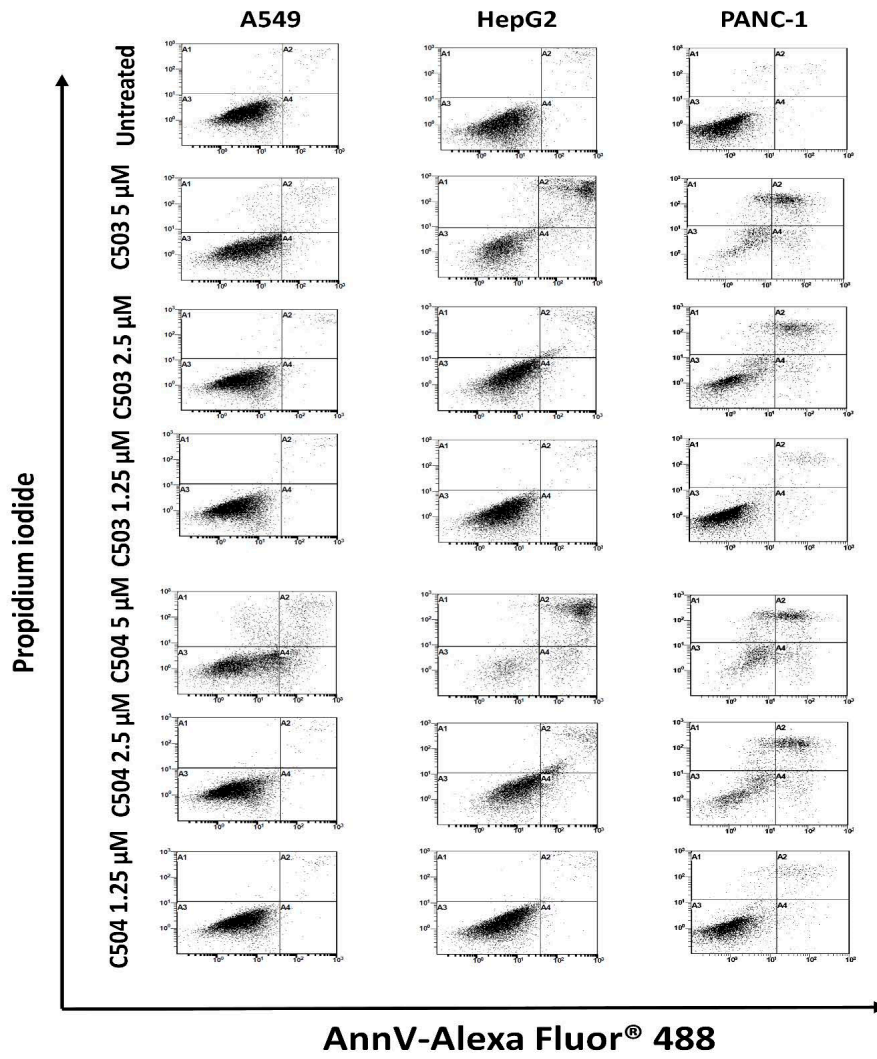

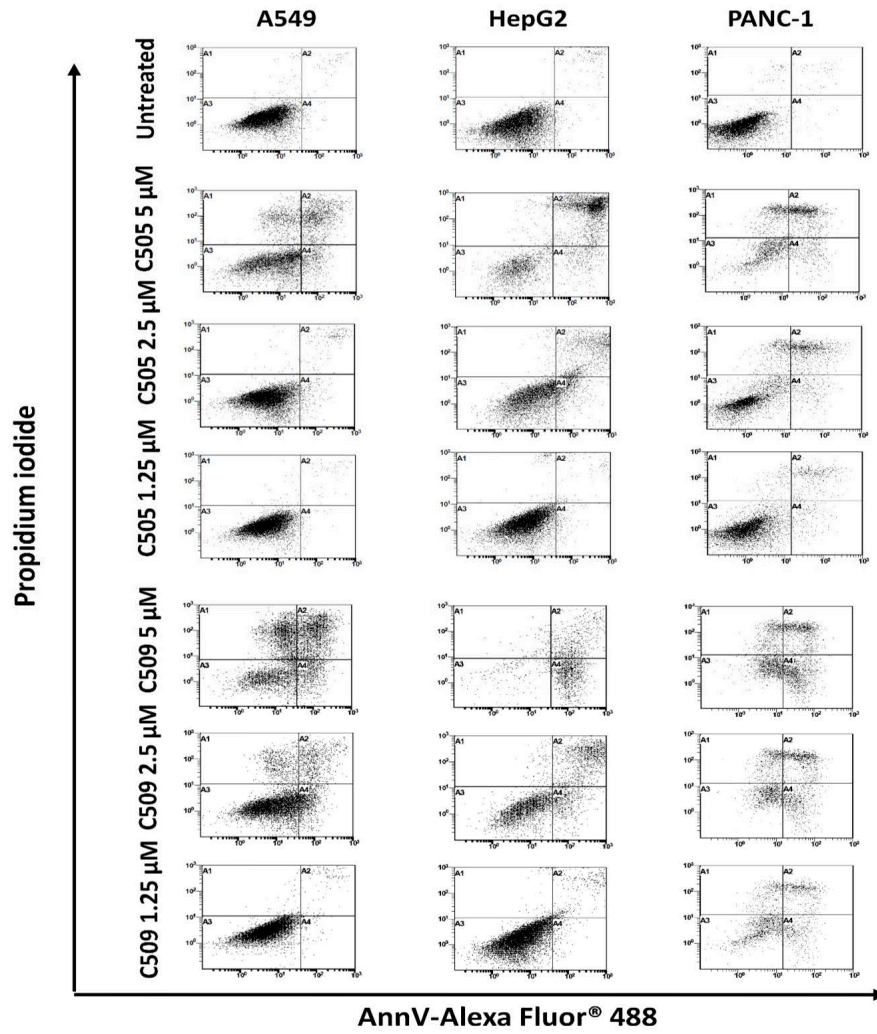

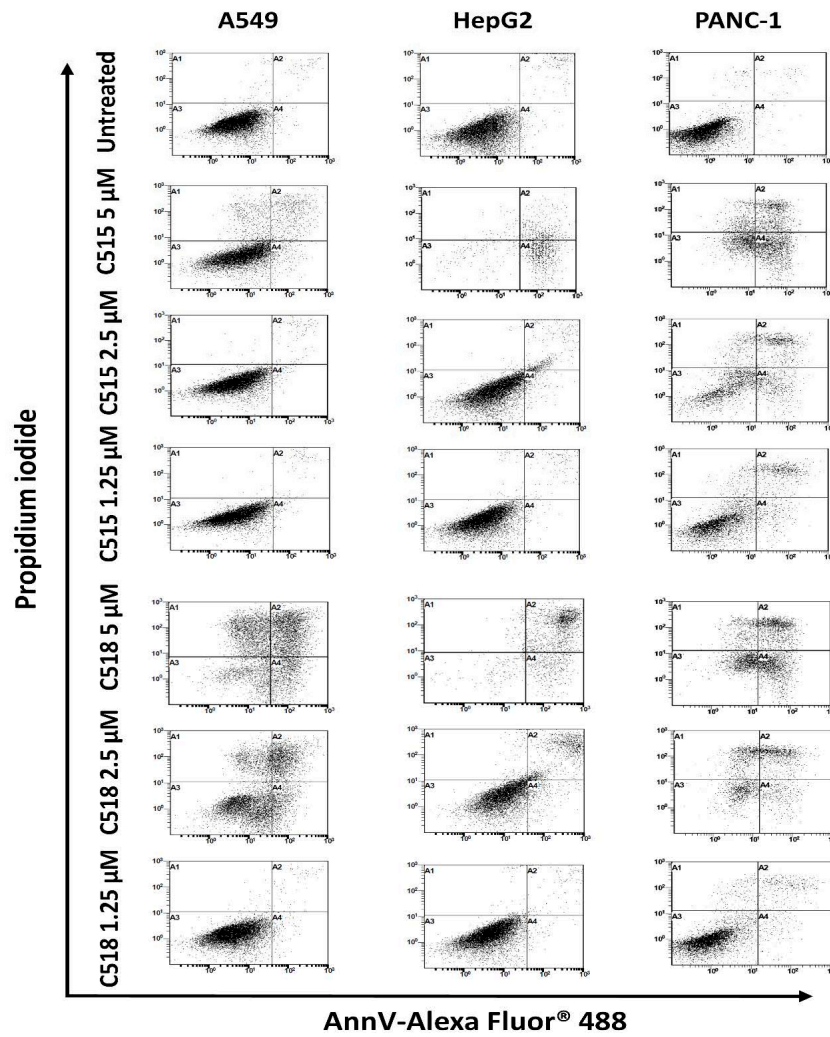

**Figure S4.** Detection of phosphatidylserine exposure on A549, HepG2 and PANC-1 cells. Representative dot plot images of cells treated with curcumin (C, 12.5, 25 and 50  $\mu\text{M}$ ), and curcumin analogs (1.25, 2.5, 5  $\mu\text{M}$ ) in duplicates for 72 h. Phosphatidylserine exposure was detected as described in 3.3.1. Materials and methods.

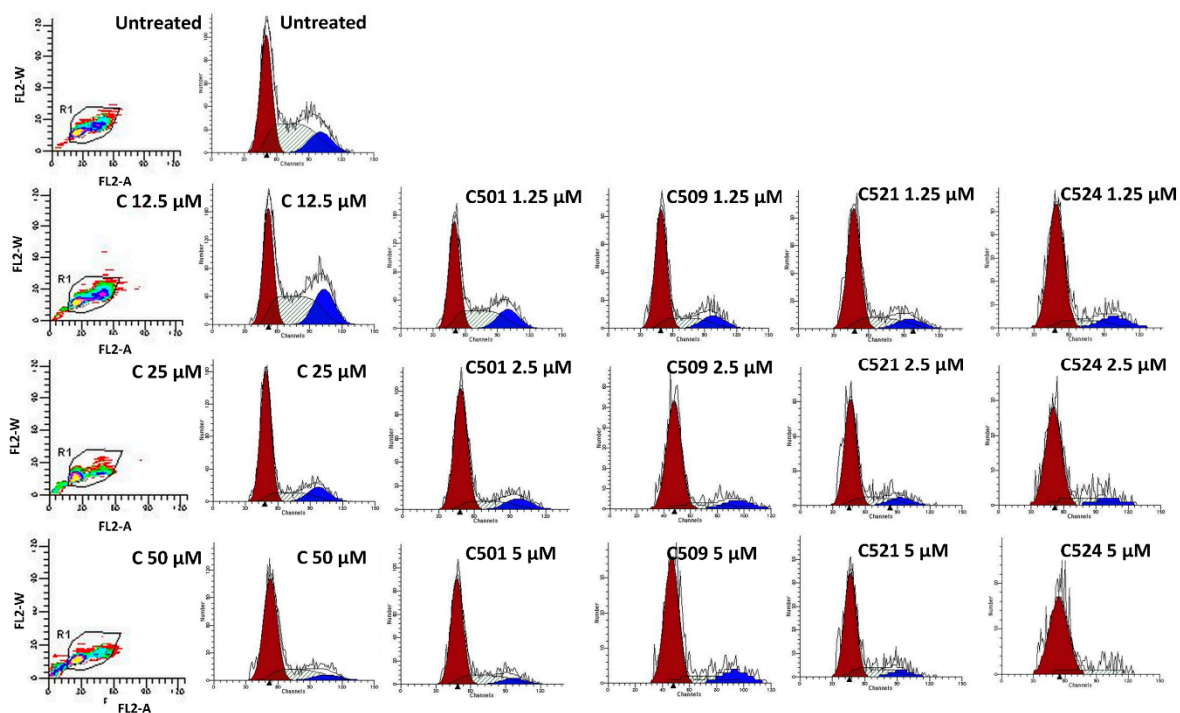

**Figure S5.** Cell cycle analysis of PANC-1 cells upon curcumin and curcumin analog treatment. Cells were treated with curcumin (C, 12.5, 25 and 50  $\mu\text{M}$ ) and curcumin analogs (1.25, 2.5 and 5  $\mu\text{M}$ ) in duplicate for 72 h. Representative images show cell cycle distribution analysis as described in the 3.3.2. Materials and methods.
